# Supplementary material for: Achieving remarkable energy storage enhancement in polymer dielectrics via constructing an ultrathin Coulomb blockade layer of gold nanoparticles
Source: Royal Society of Chemistry journal article supplement (doi:10.1039/d3mh00084b), 2023-01-01
Supplement: d3mh00084b1.pdf [file d3mh00084b1.pdf]

1 *Supporting Information for*

2 **Achieving Remarkable Energy Storage Enhancement in Polymer**  
3 **Dielectrics via Constructing an Ultrathin Coulomb Blockade Layer of**  
4 **Gold Nanoparticles**

5

6 Shuimiao Xia<sup>a</sup>, Zhicheng Shi<sup>a, \*</sup>, Kai Sun<sup>b, \*</sup>, Peng Yin<sup>a</sup>, Davoud Dastan<sup>d</sup>, Yao Liu<sup>c</sup>, Hongzhi Cui<sup>a</sup>, Runhua Fan<sup>b, c</sup>

7 <sup>a</sup> *School of Materials Science and Engineering, Ocean University of China, Qingdao 266100, China*

8 <sup>b</sup> *College of Ocean Science and Engineering, Shanghai Maritime University, Shanghai 201306, P. R. China*

9 <sup>c</sup> *Key Laboratory for Liquid-Solid Structural Evolution and Processing of Materials (Ministry of Education),*  
10 *Shandong University, Jinan 250061, China*

11 <sup>d</sup> *Department of Materials Science and Engineering, Georgia Institute of Technology, Atlanta, Georgia-30332, USA*

12 \*Corresponding author.

13 *E-mail: zcshi@ouc.edu.cn (Z. Shi); kais@shmtu.edu.cn (K. Sun)*

14

15 **Keywords:**

16 Polymer dielectrics; Energy storage; Dielectric; Breakdown strength; Coulomb blockade

17

18 **Materials**

19 poly (vinylidene fluoride-hexafluoropropylene) (P(VDF-HFP)) (15 % HFP), commercial  
20 biaxially oriented polypropylene (BOPP) film and poly (methyl methacrylate) (PMMA) are  
21 purchased from PolyK Technologies, 1-methyl-2-pyrrolidone (NMP) and N, N-dimethylformamide  
22 (DMF) are acquired from Sinopharm Chemical Reagent Co., Ltd, nickel foam (350 g m<sup>-2</sup>, Hefei  
23 Kejing Material Technology Co., Ltd.) and acetone (≥ 99.7 %, Sinopharm Chemical Reagent Co.,  
24 Ltd.).

25

26 **Preparation of pure polymer films**

27 At first, P(VDF-HFP) and PMMA powders were dispersed respectively into NMP and DMF  
28 solvent by rapid magnetic stirring at 75 °C for 5 h and moderate stirring at room temperature  
29 overnight to obtain the P(VDF-HFP) and PMMA casting solutions. Subsequently, the solutions

30 were casted on the glass plates and dried in an oven at 100 °C for 4 h and 200 °C for 5 min. After  
31 that, the films were immediately quenched in ice water and stripped from the glass plate. Finally,  
32 the films were dried at 50 °C for 4 h in the oven.

33

#### 34 **Characterization and measurements**

35 The morphologies of gold nanoparticles were characterized by transmission electron  
36 microscopy (TEM, JEM-2100PLUS). The crystal structure of the films was analyzed using an X-  
37 ray diffraction (XRD, Bruker D8 Advance, Germany). Fourier transform infrared spectroscopy  
38 (FTIR) was performed by a Nicolet iS5 instrument from 3200 cm<sup>-1</sup> to 400 cm<sup>-1</sup>. For the dielectric  
39 property measurements, gold electrodes were sputtered on the films. The dielectric permittivity and  
40 dielectric loss were tested using an Agilent E4980A Precision LCR analyzer in the frequency range  
41 of 100 Hz to 1 MHz. The permittivity was calculated by  $\epsilon_r = tC_p/A\epsilon_0$ , where  $t$  is the thickness of the  
42 sample,  $C_p$  is the parallel capacitance,  $A$  is the area of the electrode, and  $\epsilon_0$  is the absolute permittivity  
43 of free space ( $8.85 \times 10^{-12}$  F m<sup>-1</sup>). The breakdown strength was obtained using a machinery  
44 consisting of a Trek 610 C amplifier with a voltage ramping rate of 500 V/s at room temperature  
45 (PolyK Technologies, USA). The energy-storage performances were acquired by the  $P$ - $E$  loops  
46 which were collected at 100 Hz using a ferroelectric test system based on a modified Sawyer-Tower  
47 circuit (PolyK Technologies, USA). The leakage current densities of the films under varied electric  
48 fields were collected by a source meter (2450, Keithley Instruments). Young's modulus was  
49 measured through the Discovery DMA 850. The fast charge-discharge performances were tested by  
50 using the capacitor charge-discharge test system with a load resistor (RL) of 10 k $\Omega$  (PolyK  
51 Technologies, PA, USA).

52

53

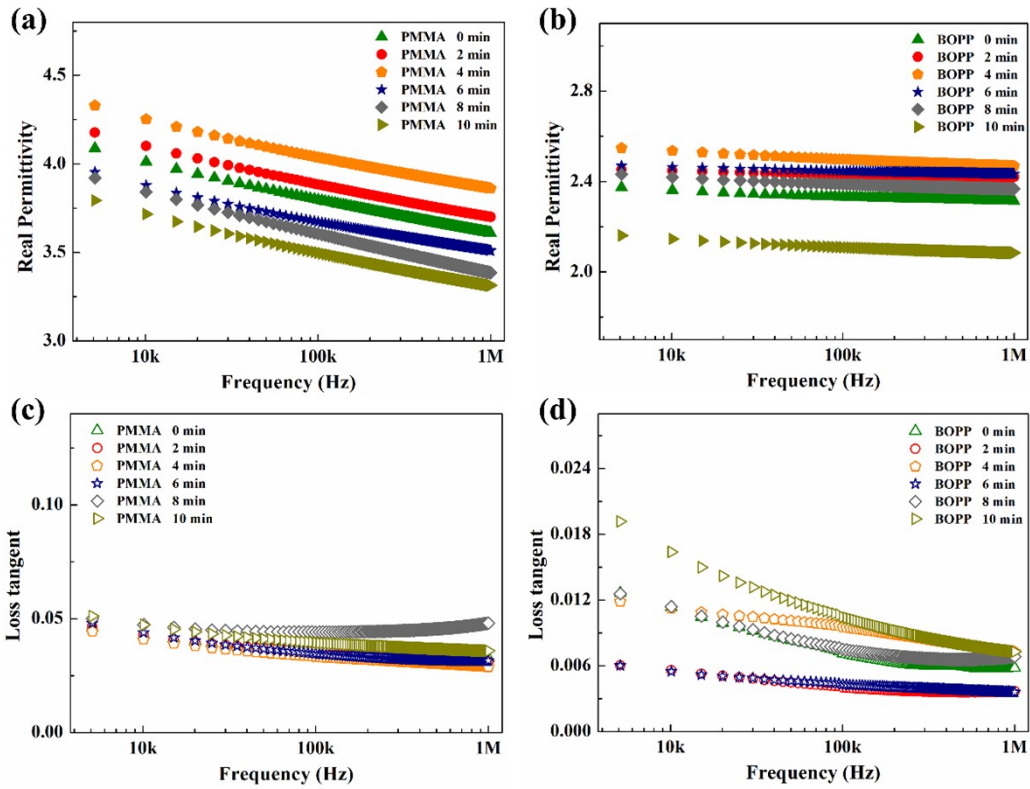

54

55 **Fig. S1** (a, b) Dielectric permittivity and (c, d) loss tangent of PMMA-Au-PMMA and BOPP-Au-  
 56 BOPP films.

57

58

59

60

61

62

63

64

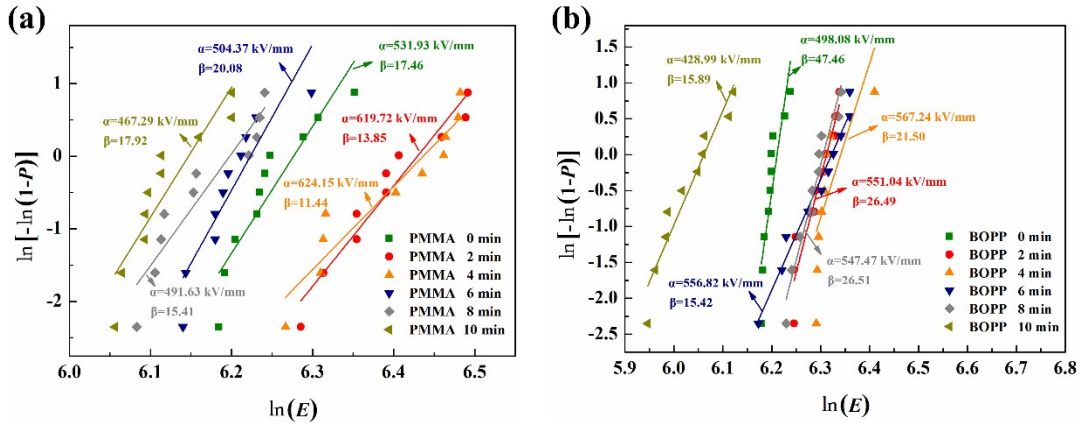

65

66 **Fig. S2** Two-parameter Weibull distribution plots of (a) PMMA-Au-PMMA and (b) BOPP-Au-

67 BOPP films.

68

69

70

71

72

73

74

75

76

77

78

79

80

81

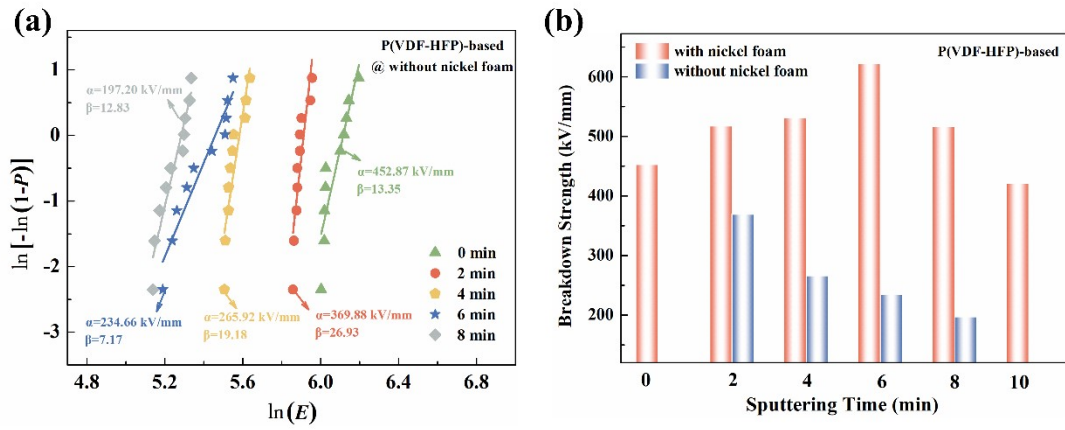

82

83 **Fig. S3** Two-parameter Weibull distribution plots of (a) P(VDF-HFP)-based composite films

84 without nickel foam and (b) the variation of breakdown strength of the P(VDF-HFP)-based

85 composite films with different gold sputtering time.

86

87

88

89

90

91

92

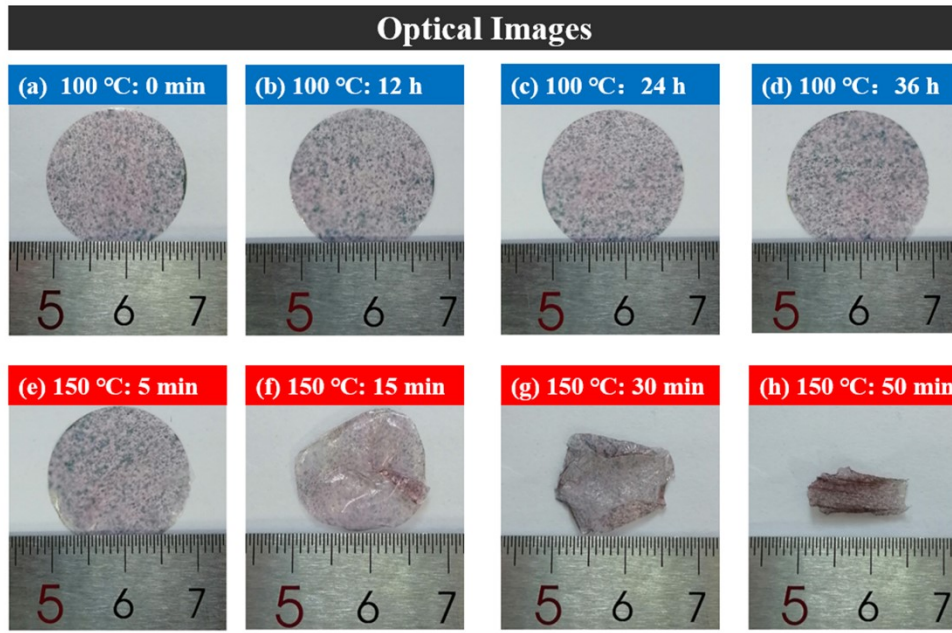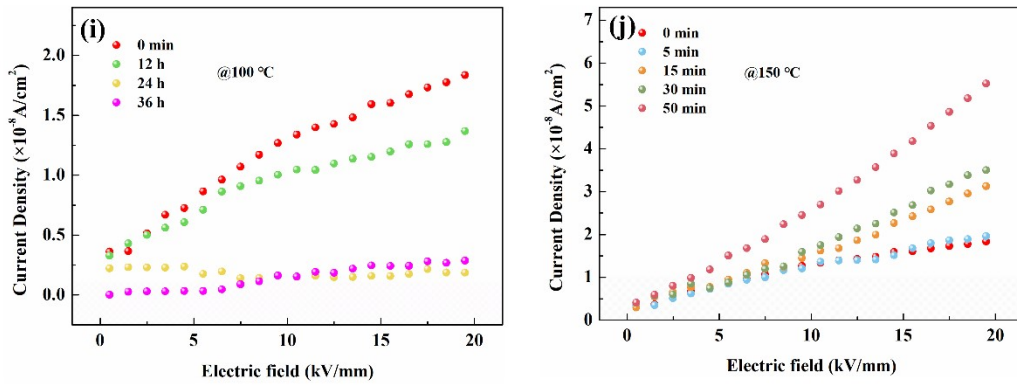

93

94 **Fig. S4** (a-h) The optical images of P(VDF-HFP) film with 6 min gold sputtering baked at 100 °C  
 95 and 150 °C. The current densities of P(VDF-HFP) film with 6 min gold sputtering at (i) 100 °C and  
 96 (j) 150 °C.

97

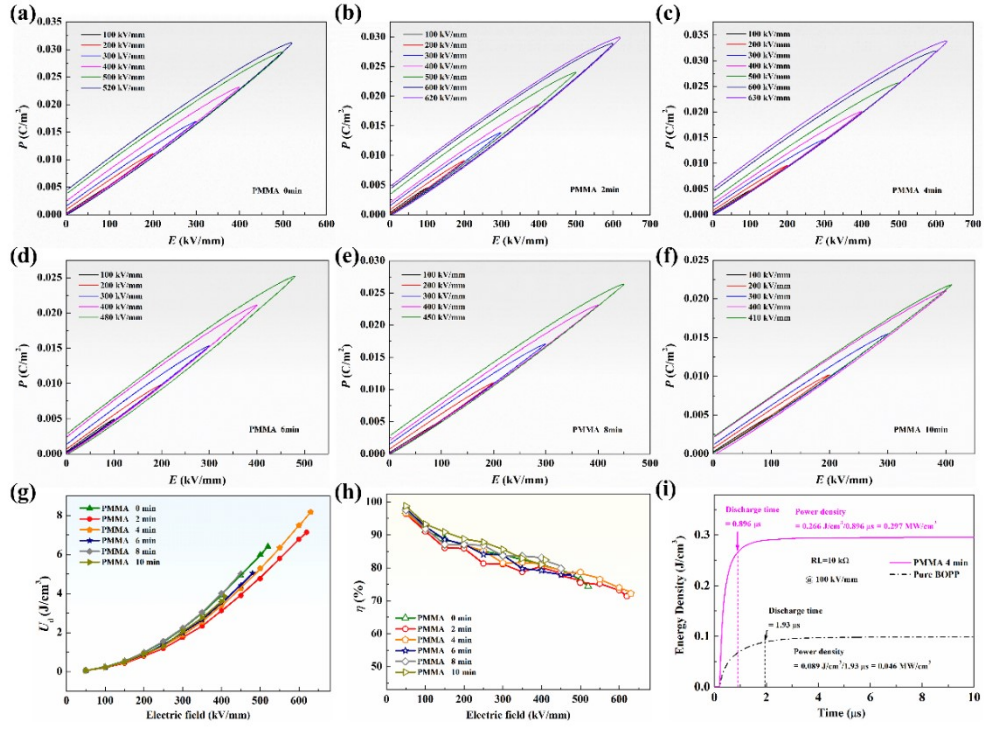

98

99 **Fig. S5** (a-f)  $P$ - $E$  loops. (g) The discharged energy density  $U_d$  and (h) efficiency  $\eta$  of PMMA-Au-  
 100 PMMA films. (i) Discharge energy density as a function of time of pure BOPP and PMMA film  
 101 with 4 min gold sputtering.

102

103

104

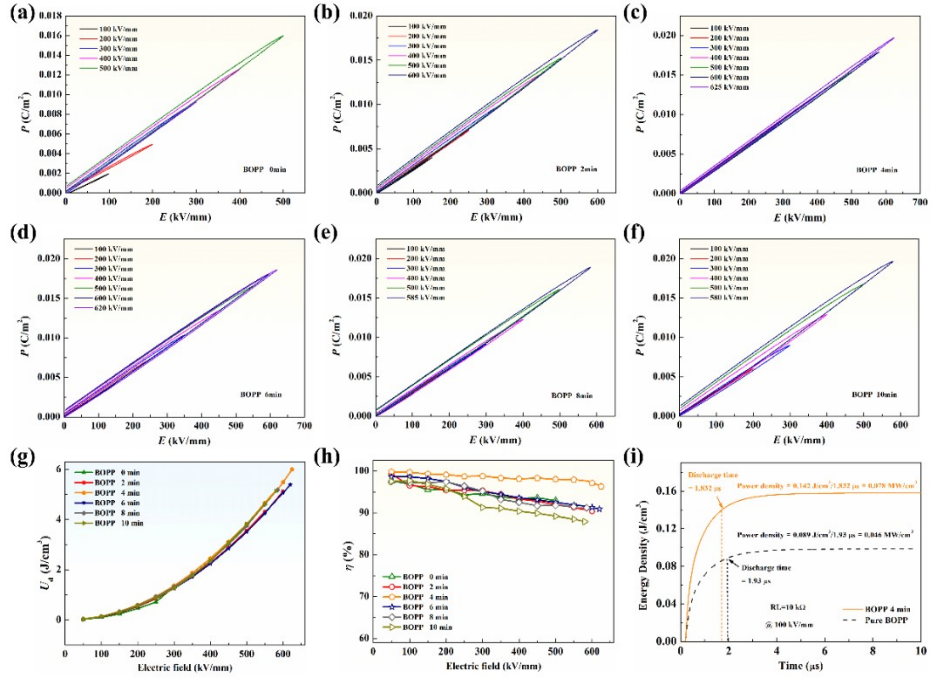

105

106 **Fig. S6** (a-f)  $P$ - $E$  loops. (g) The discharged energy density  $U_d$  and (h) efficiency  $\eta$  of BOPP-Au-

107 BOPP films. (i) Discharge energy density as a function of time of pure BOPP and BOPP film with

108 4 min gold sputtering.

109

110

111

112

113

114



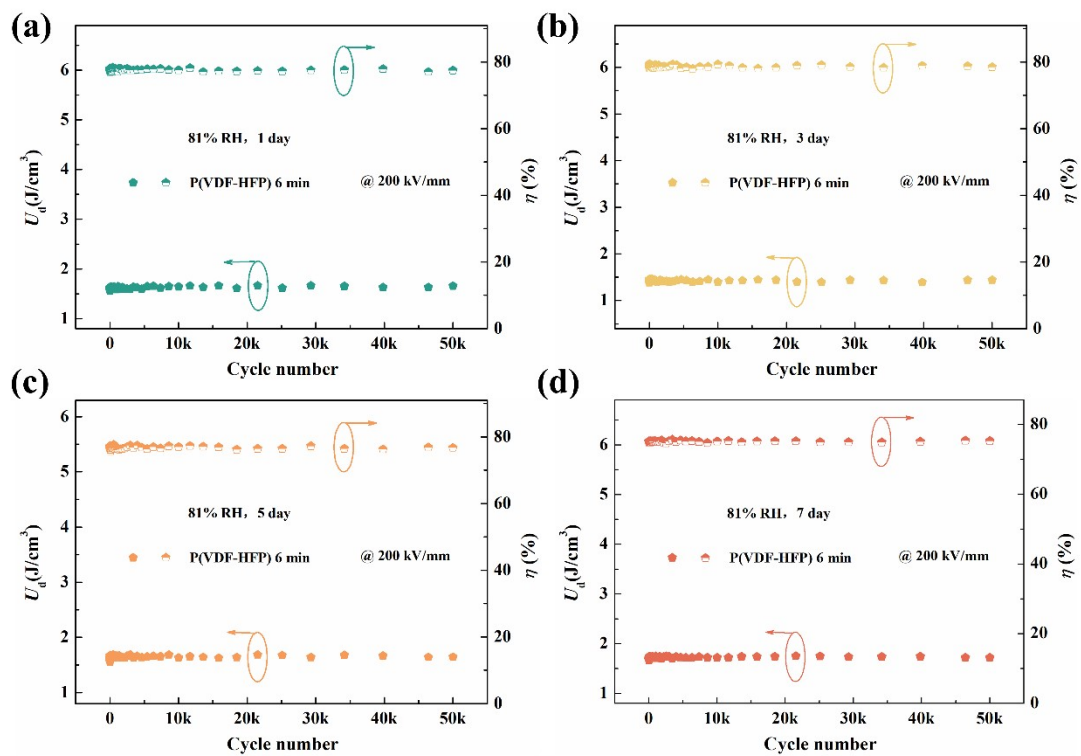

115

116 **Fig. S7** The cycling stabilities of P(VDF-HFP) films with 6 min gold sputtering at 81% relative  
 117 humidity (RH) for (a) 1 day, (b) 3 days, (c) 5 days, and (d) 7 days.

118

119

120

121

122

123

124

125

126

127

128

129

130

131

132

133 **Table:**

134 **Table S1.** Coulomb blockade barrier energy of gold particles with different sizes in polymer films.

| $r(\text{nm})$ | $p$ | $C_1(\text{F m}^{-1})$ | $C(\text{F})$          | $e^2/2C(\text{meV})$ |
|----------------|-----|------------------------|------------------------|----------------------|
| 1              | 5   | $1.2 \times 10^{-11}$  | $1.08 \times 10^{-19}$ | 740                  |
| 2              | 5   | $1.2 \times 10^{-11}$  | $2.16 \times 10^{-19}$ | 370                  |
| 3              | 5   | $1.2 \times 10^{-11}$  | $3.24 \times 10^{-19}$ | 250                  |
| 4              | 5   | $1.2 \times 10^{-11}$  | $4.32 \times 10^{-19}$ | 185                  |
| 5              | 5   | $1.2 \times 10^{-11}$  | $5.4 \times 10^{-19}$  | 148                  |
| 6              | 5   | $1.2 \times 10^{-11}$  | $6.48 \times 10^{-19}$ | 123                  |

135

136
